# Supplementary material for: MOSAIK: A Hash-Based Algorithm for Accurate Next-Generation Sequencing Short-Read Mapping
Source: PubMed Central journal article supplement (PMC3944147; doi:10.1371/journal.pone.0090581), 2014-03-05
Supplement: pone.0090581.s008.pdf [file pone.0090581.s008.pdf]

# Supplemental Table

Table S1: The runtime of each mapper for aligning six million 100bp reads. The version without ‘\*’ are the exact version of each mapper for which we report performance comparisons. For up to date information, we also report speed for the current version (indicated by ‘\*’) of each software. STAMPY is a single-threaded program and thus the runtime of using 4 cpus is not available.

|                    | Run time; 4 cpus | Run time; 1 cpu |
|--------------------|------------------|-----------------|
| BOWTIE (2.0-beta5) | 15m 6.547s       | 42m 23.591s     |
| BWA (0.5.9)        | 26m 21.311s      | 69m 52.714s     |
| MOSAIK (2.1.78)    | 89m 48.887s      | 378m 15.979s    |
| STAMPY (1.0.13)    | Not available    | 404m 11.122s    |
| *BOWTIE (2.1.0)    | 17m 38.875s      | 45m 28.829s     |
| *BWA (0.7.5a)      | 17m 18.782s      | 59m 46.641s     |
| *MOSAIK (2.2.3)    | 17m 11.22s       | 67m 23.724s     |
| *STAMPY (1.0.22)   | Not available    | 569m11.897s     |
